# Supplementary material for: Late Quaternary faulting in the southern Matese (Italy): implications for earthquake potential and slip rate variability in the southern Apennines
Source: Copernicus journal article supplement (doi:10.5194/se-13-553-2022), 2022-03-17
Supplement: Supplementary file 3 [file se-13-553-2022-supplement.zip]

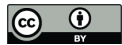

## *Supplement of*

# **Late Quaternary faulting in the southern Matese (Italy): implications for earthquake potential and slip rate variability in the southern Apennines**

**Paolo Boncio et al.**

*Correspondence to:* Paolo Boncio ([paolo.boncio@unich.it](mailto:paolo.boncio@unich.it))

- [se-13-553-2022-supplement-title-page.pdf](#)
- [Annex-S1\\_dating reports.pdf](#)
- [FaultTraces\\_SMFSystemWGS84.zip](#)
- [Figure-S1\\_knickpoint-close-to-profile4.png](#)
- [Figure-S2\\_details-faultzone2-Fig9.png](#)
- [Figure-S3\\_restoration-F4-F5-antitheticF6.png](#)
- [Figure-S4\\_restoration-surface-faulting-events.png](#)
- [Plate\\_S1\\_GeoMap-GioiaSanniticaFault.pdf](#)
- [Tab. S1\\_Complete 40Ar39Ar results.xls](#)
- [Tab. S2\\_Paleosol analysis \(San Potito site\).xls](#)
- [Tab. S3\\_Data points with structural data.xls](#)
- [Text S1\\_Results of paleosol analysis \(San Potito site\).pdf](#)

The copyright of individual parts of the supplement might differ from the article licence.
