# Supplementary material for: Late Quaternary faulting in the southern Matese (Italy): implications for earthquake potential and slip rate variability in the southern Apennines
Source: Copernicus journal article supplement (doi:10.5194/se-13-553-2022), 2022-03-17
Supplement: Supplementary file 4 [file se-13-553-2022-supplement.zip]

Archive with 12 entries (12 files):
- Figure-S2_details-faultzone2-Fig9.png
- Tab. S3_Data points with structural data.xls
- Plate_S1_GeoMap-GioiaSanniticaFault.pdf
- Figure-S3_restoration-F4-F5-antitheticF6.png
- se-13-553-2022-supplement-title-page.pdf
- Tab. S1_Complete 40Ar39Ar results.xls
- FaultTraces_SMFSystemWGS84.zip
- Figure-S1_knickpoint-close-to-profile4.png
- Figure-S4_restoration-surface-faulting-events.png
- Text S1_Results of paleosol analysis (San Potito site).pdf
- Annex-S1_dating reports.pdf
- Tab. S2_Paleosol analysis (San Potito site).xls
