# Supplementary material for: Late Quaternary faulting in the southern Matese (Italy): implications for earthquake potential and slip rate variability in the southern Apennines
Source: Copernicus journal article supplement (doi:10.5194/se-13-553-2022), 2022-03-17
Supplement: Supplementary file 4 [file se-13-553-2022-supplement.zip › Tab. S1_Complete 40Ar39Ar results.xls]

## Sheet: Complete isotope data
Table S1 - Complete 40Ar/39Ar results
Single crystal fusions
Sample:	S-228-F2				J-value:	0.00039168	5.5e-07	(2σ)
Material:	sanidine
	Laser	40Ar	± 2σ40	39Ar	±2σ39	37Ar	± 2σ37	36Ar	± 2σ36							Included in
File	power (%)	(cps)	(cps)	(cps)	(cps)	(cps)	(cps)	(cps)	(cps)	40Ar*/39ArK	± 2σ	%40Ar*	Age (ka)	± 2σ (ka)	K/Ca	weighted mean
NAH1313	15	491538	152.157	640688	832.618	6096.4	442.888	88.8078	2.95433	0.726036	0.00321645	94.6336	520.471	2.30544	45.1896
NAH1316	15	246037	116.928	285903	407.466	3100.06	506.246	138.538	4.04234	0.716214	0.00507978	83.2257	513.431	3.64103	39.6564
NAH1319	15	347527	159.484	342207	488.167	2971.2	601.811	340.127	6.17044	0.718951	0.00590719	70.7941	515.392	4.23408	49.5249
NAH1321	15	293627	146.094	390286	546.627	4445.05	437.001	41.2369	2.97631	0.721161	0.00389264	95.855	516.977	2.79011	37.7547
NAH1324	15	434164	138.205	532866	670.185	7111.49	500.271	186.384	3.95166	0.710865	0.00345252	87.2463	509.597	2.47466	32.2197	YES
NAH1326	15	206519	98.9887	275927	369.414	2884.3	476.758	34.6304	2.17688	0.711276	0.00384156	95.0319	509.891	2.75351	41.1358	YES
NAH1329	15	225033	111.858	296411	398.267	4024.88	326.729	50.3242	2.33637	0.709044	0.0038102	93.3937	508.292	2.73103	31.667	YES
NAH1331	15	184605	100.557	244896	336.609	2934.33	488.053	24.7196	1.85567	0.724087	0.00382051	96.0562	519.074	2.73841	35.887
NAH1334	15	465768	142.235	420692	502.626	5522.57	414.768	563.857	6.31592	0.70749	0.0048727	63.9015	507.178	3.4926	32.7558	YES
NAH1336	15	459578	149.42	591824	715.221	7184.66	461.9	126.023	3.17437	0.713397	0.00310868	91.8672	511.412	2.2282	35.4202
NAH1339	15	171900	83.3777	188766	257.336	1730.42	628.391	130.199	3.26285	0.704915	0.0057637	77.4072	505.332	4.13125	46.907	YES
NAH1341	15	241566	125.207	314875	463.788	3690.26	538.447	63.7711	2.59559	0.707106	0.00408467	92.1688	506.903	2.92777	36.6899	YES
NAH1344	15	411855	125.04	564435	742.463	6414.39	572.998	37.9734	2.5482	0.709956	0.00337631	97.2965	508.945	2.42003	37.8376	YES
NAH1346	15	88662.9	77.1437	117865	212.142	1228.13	477.865	18.6464	2.32209	0.705299	0.00710955	93.7589	505.607	5.09591	41.2671	YES
NAH1349	15	196433	100.75	249719	360.261	3235.49	659.433	58.8769	2.86856	0.716713	0.00463482	91.1129	513.789	3.32209	33.1877
NAH1354	15	346866	143.951	443886	585.202	5059.63	334.268	105.317	3.06865	0.710961	0.00353957	90.9813	509.666	2.53705	37.724	YES
NAH1356	15	235981	131.544	195797	296.114	2631.7	578.378	326.385	5.04924	0.708075	0.00802561	58.7496	507.597	5.75252	31.9915	YES
NAH1359	15	214512	98.8677	269130	374.762	3291.21	601.592	78.2522	2.72223	0.71068	0.00424117	89.1624	509.464	3.03994	35.1618	YES
NAH1361	15	121004	93.1449	163719	286.623	2140.97	496.416	18.8129	2.67344	0.70529	0.00629103	95.4251	505.601	4.50923	32.8817	YES
												plateau age (12 of 19):	508.45	0.88
Sample:	S-277				J-value:	0.00039168	5.5e-07	(2σ)
Material:	sanidine
	Laser	40Ar	± 2σ40	39Ar	±2σ39	37Ar	± 2σ37	36Ar	± 2σ36							Included in
File	power (%)	(cps)	(cps)	(cps)	(cps)	(cps)	(cps)	(cps)	(cps)	40Ar*/39ArK	± 2σ	%40Ar*	Age (ka)	± 2σ (ka)	K/Ca	weighted mean
NAH1417	15	290369	159.246	152319	243.158	4089.71	670.391	576.144	8.82827	0.778623	0.0174594	40.8435	558.163	12.514	16.0148	YES
NAH1420	15	209314	109.09	192394	295.75	2118.64	565.287	178.559	4.24033	0.81119	0.00702101	74.5613	581.506	5.03225	39.0481
NAH1422	15	196229	102.679	212017	291.019	2500.37	405.239	68.4079	3.17174	0.829604	0.00512521	89.6343	594.703	3.67342	36.4611
NAH1425	15	494729	177.076	422146	530.242	5032.35	398.05	495.709	7.18087	0.821762	0.00541706	70.1193	589.083	3.88261	36.0709
NAH1427	15	63657.8	63.2835	63569.3	122.457	406.323	371.797	44.8853	2.63848	0.790553	0.0128085	78.945	566.714	9.18042	67.2733	YES
NAH1434	15	181671	127.718	90958.9	158.974	1493.5	619.454	360.594	6.07522	0.814453	0.0201095	40.7776	583.844	14.4133	26.188
NAH1437	15	106376	79.3194	114147	207.394	1210.59	477.905	34.8961	2.86649	0.840953	0.00819229	90.238	602.838	5.87168	40.5446
NAH1444	15	138025	99.8702	149903	261.766	1842.66	409.211	66.506	3.07594	0.788741	0.00691409	85.6612	565.415	4.95565	34.9808
NAH1447	15	328657	147.559	336473	496.674	3626.14	628.653	174.723	4.31217	0.822054	0.0046211	84.1597	589.292	3.31212	39.8999
NAH1452	15	141468	93.4394	148550	237.254	2071.64	620.21	51.8758	2.69208	0.848637	0.00611307	89.1111	608.345	4.38142	30.8336
NAH1454	15	184060	123.81	216620	362.246	2772.44	561.242	43.3804	2.84036	0.79038	0.00513525	93.019	566.59	3.68067	33.597	YES
NAH1457	15	156657	110.179	121905	213.341	1570.46	570.382	176.129	4.30182	0.854201	0.0108155	66.4702	612.333	7.75175	33.3777
NAH1459	15	165420	108.647	187629	303.94	2335.04	412.73	39.2888	2.71804	0.819565	0.00532157	92.9593	587.508	3.81418	34.5518
NAH1462	15	155443	103.007	167989	277.888	2143.13	709.615	49.8587	3.02744	0.837184	0.00617733	90.4744	600.137	4.4275	33.7052	YES
NAH1464	15	171404	117.254	189169	308.865	2774.53	498.93	77.258	3.20588	0.784786	0.00590387	86.6113	562.58	4.23159	29.3173	YES
NAH1467	15	109709	96.2274	121353	225.578	1491.84	574.777	48.6457	2.69514	0.784811	0.00747664	86.8096	562.598	5.35887	34.9778	YES
												plateau age (6 of 16):	564.5	2.1
Sample:	C9-DO				J-value:	0.00039168	5.5e-07	(2σ)
Material:	sanidine
	Laser	40Ar	± 2σ40	39Ar	±2σ39	37Ar	± 2σ37	36Ar	± 2σ36							Included in
File	power (%)	(cps)	(cps)	(cps)	(cps)	(cps)	(cps)	(cps)	(cps)	40Ar*/39ArK	± 2σ	%40Ar*	Age (ka)	± 2σ (ka)	K/Ca	weighted mean
NAH1472	15	20833.4	50.2967	56773.8	214.41	1283.69	522.766	21.5497	2.47502	0.254883	0.0210852	69.4578	182.734	15.1159	19.0173	YES
NAH1477	15	84151.6	92.4895	258776	521.997	4460	553.039	45.4411	2.87767	0.27359	0.010727	84.1313	196.145	7.6901	24.949	YES
NAH1479	15	43234.3	60.8172	128894	312.077	2763.82	444.713	44.5763	2.99803	0.233333	0.0136777	69.5621	167.285	9.80561	20.0532
NAH1482	15	23903.3	48.1682	73557.6	236.943	1816.89	426.726	15.5105	2.48331	0.263425	0.0189252	81.0622	188.858	13.5674	17.4084	YES
NAH1489	15	16347.7	50.7509	50446.3	235.031	923.598	511.394	10.2917	2.74246	0.264064	0.0281511	81.4846	189.316	20.1814	23.486	YES
NAH1494	15	28069.8	60.0977	88596.7	295.472	1948.43	534.561	14.307	2.56787	0.269818	0.0190231	85.1613	193.441	13.6375	19.5521	YES
NAH1499	15	39561.1	50.5195	45029.6	104.681	834.748	508.03	94.0157	3.00131	0.256134	0.0204398	29.1536	183.631	14.6532	23.1956	YES
NAH1502	15	49951.5	60.799	164480	347.943	2928.61	491.196	22.8187	2.36462	0.263146	0.0121646	86.6473	188.658	8.72076	24.1498	YES
NAH1504	15	38702.6	53.2035	93308.9	215.897	1816.67	472.736	48.7704	2.71427	0.259732	0.0125732	62.6186	186.21	9.01368	22.0856	YES
NAH1507	15	98985.1	83.3826	153735	267.018	3454.46	590.813	197.591	4.31263	0.261379	0.00952891	40.5946	187.391	6.83123	19.1362	YES
NAH1509	15	29999	46.2899	90161.6	227.725	2221.11	384.437	20.9348	2.30437	0.264815	0.0144822	79.5885	189.854	10.3822	17.4547	YES
NAH1512	15	32454.3	59.5847	95070.6	278.272	1878.99	508.256	28.1142	2.39957	0.254108	0.0157689	74.4365	182.178	11.3047	21.7562	YES
NAH1514	15	27332.4	63.755	69314.4	252.024	1545.76	391.895	30.4381	2.58654	0.264446	0.018564	67.062	189.59	13.3084	19.2816	YES
NAH1517	15	66355.6	60.7687	189959	336.722	2535.69	538.97	29.2183	2.63932	0.303912	0.0093616	87.0013	217.882	6.71118	32.2128
												plateau age (12 of 14):	188.8	3
The values in this table have been corrected for instrument background, source mass bias, detector efficiency, and decay of 37Ar and 39Ar
Instrument:		Noblesse 5-collector mass spectrometer
Standard:		Alder Creek rhyolite sanidine
Standard age (Ma):		1.1864	0.0003	Jicha et al. (2016)
Atmospheric argon ratios
40Ar/36Ar	298.56	0.31	Lee et al. (2006)
38Ar/36Ar	0.1885	0.0003	Lee et al. (2006)
Interfering isotope production ratios
(40Ar/39Ar)K	0.00054	0.00014	Jicha & Brown (2014)
(38Ar/39Ar)K	0.0121	2e-05	Jicha & Brown (2014)
(39Ar/37Ar)Ca	0.000695	9e-06	Renne et al. (2013)
(38Ar/37Ar)Ca	1.96e-05	8e-07	Renne et al. (2013)
(36Ar/37Ar)Ca	0.000265	2.2e-05	Renne et al. (2013)
Decay constants
l40Ar	(0.580 ± 0.014) x 10-10 a-1		Min et al. (2000)
lB-	(4.884 ± 0.099) x 10-10 a-1		Min et al. (2000)
39Ar	(2.58 ± 0.03) x 10-3 a-1		Stoenner et al. (1965)
37Ar	(8.23 ± 0.042) x 10-4 h-1		Stoenner et al. (1965)
36Cl	(2.303 ± 0.046) x 10-6 a-1
