# Supplementary material for: Late Quaternary faulting in the southern Matese (Italy): implications for earthquake potential and slip rate variability in the southern Apennines
Source: Copernicus journal article supplement (doi:10.5194/se-13-553-2022), 2022-03-17
Supplement: Supplementary file 4 [file se-13-553-2022-supplement.zip › Tab. S2_Paleosol analysis (San Potito site).xls]

## Sheet: Foglio1
Table S2 - Particle-size and chemical composition of paleosol (San Potito site, Sample S228_3 in Fig. 9 of main text)
	Particle size distribution
Horizon	Sand %	Silt %	Clay %	pH (H2O)	O.M %	CEC (cmol(+)/ Kg)
S228_3 2Ab	39.9	44.1	16	7.94	1.33	46.42
S228_3 2Bwb	30.5	63.5	6	7.79	0.54	43.52
	Chemical composition
	Alo%	Alp%	Sio%	Feo%	Fed%	Fet%	Alo+0.5 Feo%	(Alo-Alp)/Sio	Alp/Alo	Feo/Fed	Fd/Fet	(Fed-Feo)/Fet	Fet-Fed %
2Ab	0.93	0.88	0.54	0.40	2.27	8.95	1.13	0.09	0.95	0.18	0.25	0.21	6.69
2Bwb	0.74	0.29	0.35	0.30	1.73	9.94	0.89	1.29	0.39	0.17	0.17	0.14	8.21
O.M= organic matter; CEC= Cation Exchange Capacity; Alo,Sio, Feo = ammonium oxalate extracted aluminum,silica and iron; Alp=sodium pyrophosphate extracted aluminum; Fet= total iron; Alo+0.5 Feo, (Alo-Alp)/Sio=Andic properties and potential occurrence of short range order minerals (SROM), Alp/Alo = active Al content incorporated into allophanic components; Feo/Fed= Active iron ratio; Fed/Fet= crys…
