# Supplementary material for: Late Quaternary faulting in the southern Matese (Italy): implications for earthquake potential and slip rate variability in the southern Apennines
Source: Copernicus journal article supplement (doi:10.5194/se-13-553-2022), 2022-03-17
Supplement: Supplementary file 4 [file se-13-553-2022-supplement.zip › Tab. S3_Data points with structural data.xls]

## Sheet: SeleKinematicsAPMF-GF_Paolo2020
Table S3 – Data points with structural data (Southern Matese Fault system)
ID observer	LAT	LON	Fault strike	Fault dip	Slip vector trend	Slip vector plunge	Fault	Source
85	41.3681	14.2542	112	69			APMF	B16
A84	41.3741	14.2413	116	62	226	53	APMF	B16
AIL10	41.3845	14.2184	115	76			APMF	B16
AIL11	41.3695	14.2518	111	79	161	76	APMF	B16
AIL14	41.3589	14.3654	134	64			APMF	B16
AIL15	41.3698	14.2507	205	61			APMF	B16
AIL24	41.3617	14.2527	58	61	125	61	APMF	B16
AIL84	41.3542	14.2802	101	72	150	67	APMF	B16
AIL85	41.3552	14.275	87	53	135	78	APMF	B16
AIL85BIS	41.3551	14.2752	130	69	155	47	APMF	B16
AIL87	41.3552	14.2739	74	54	181	53	APMF	B16
AIL87BIS	41.3552	14.274	110	82	118	44	APMF	B16
AIL89	41.3572	14.2681	87	53	158	51	APMF	B16
Anna267	41.3531	14.2889	78	73	213	71	APMF	B16
Anna268	41.3531	14.2901	99	73	140	60	APMF	B16
S108	41.3591	14.3535	84	71	225	36	APMF	B16
S109	41.361	14.3585	104	36	206	34	APMF	B16
S112	41.3593	14.3638	117	45	210	45	APMF	B16
S134	41.3056	14.4541	158	57			GF	this work
S135	41.3055	14.4542	157	60	275	57	GF	this work
S137	41.3051	14.4544	173	70			GF	this work
S138	41.3048	14.4544	180	66			GF	this work
S14	41.311	14.4512	110	79			GF	this work
S141	41.299	14.4574	156	75			GF	this work
S144	41.2944	14.4604	132	66	209	58	GF	this work
S20	41.3148	14.4562	165	41	197	25	GF	this work
S204	41.325	14.4325	95	87	271	65	GF	this work
S205	41.325	14.4322	137	66			GF	this work
S208	41.3332	14.4233	163	41	234	39	GF	this work
S227	41.3366	14.4184	133	73			GF	this work
S228	41.3364	14.4182	125	71			GF	this work
S229	41.3468	14.4004	125	74			GF	this work
S230	41.3464	14.401	134	80			GF	this work
S231	41.3454	14.4021	127	80			GF	this work
S242	41.3511	14.3914	187	72			GF	this work
S243	41.351	14.3914	159	64			GF	this work
S244	41.3498	14.3922	113	79	202	79	GF	this work
S248	41.341	14.407	130	66	184	61	GF	this work
S248-2	41.3407	14.4075	119	59	193	58	GF	this work
S248-3	41.3406	14.4085	107	63			GF	this work
S249-2	41.3407	14.4098	105	73	182	83	GF	this work
S250	41.3256	14.4304	100	67			GF	this work
S250-2	41.3255	14.4309	103	68	233	61	GF	this work
S251	41.3265	14.4291	147	80	230	79	GF	this work
S251-2	41.3264	14.4292	117	82	184	81	GF	this work
S251-3	41.3267	14.429	139	80			GF	this work
S32	41.353	14.3875	131	71	207	70	GF	this work
S33	41.3542	14.3864	108	66			GF	this work
S34	41.3553	14.3853	80	50			GF	this work
S85	41.3528	14.3881	120	67	176	62	GF	this work
S88	41.3562	14.3852	188	82			GF	this work
S94	41.3371	14.4192	136	49	227	48	GF	this work
APMF = Ailano - Piedimonte Matese Fault; GF = Gioia Sannitica Fault; B16 = Boncio et al. (2016)
