# Supplementary material for: Late Quaternary faulting in the southern Matese (Italy): implications for earthquake potential and slip rate variability in the southern Apennines
Source: Copernicus journal article supplement (doi:10.5194/se-13-553-2022), 2022-03-17
Supplement: Supplementary file 4 [file se-13-553-2022-supplement.zip › Text S1_Results of paleosol analysis (San Potito site).pdf]

## 1    **Text S1 –Results of paleosol analysis (San Potito site)**

2    The paleosol sampled in the San Potito Sannitico area consists, from top to bottom, of the dark brown (10YR 3/3) AB<sub>b</sub> and the  
3    dark yellowish brown (10YR 4/6) 2Bw<sub>b</sub> horizons (Sample S228\_3 in Fig. 9 of the main text). The pedogenetic structure changes  
4    from crumbly granular in the AB<sub>b</sub> horizon to sub-angular blocky in the Bw<sub>b</sub> horizons, with a weak to moderate consistence, and  
5    slight field appearance of volcanic soil with andic properties, such as fluffy consistence, powdery aspect when dried, slight  
6    stickiness, no plasticity, low bulk density, high porosity, water retention and weak thixotropy (e.g. IUSS Working Group, 2014).  
7    From top to bottom, the particle size changes from loam to silty loam (Tab. S2). The occurrence of calcareous clasts mainly in  
8    the AB<sub>b</sub> horizon is in agreement with the strong reaction showed with the 10% HCl solution field test, suggesting at least a  
9    partial colluvial origin of the paleosol. The main chemical analysis indicates an organic matter content of about 1.33% in the  
10    AB<sub>b</sub> horizon. The occurrence of calcareous fragment is also consistent with the slightly alkaline pH values of about 7.8 (Tab.  
11    S2). Cation exchange capacity (CEC) shows high values in both horizons.

12    In thin section, the skeletal grains of all soil horizons are made up of volcanic and carbonate rock fragments, as well as of single  
13    pyroxene, olivine, and mica grains. Moreover, the soil horizons include unaltered to moderately altered vegetal roots, and  
14    occasional black charcoal fragments with a typical cellular structure. Abundant faunal passages and occasional planar pores  
15    represent the main porosity. Rounded to irregular Fe/Mn segregation and nodules around the grains are also present.

16    The AB<sub>b</sub> horizon shows an anisotropic pedogenetic matrix, with some isotropic domains when viewed in cross-polarized light,  
17    without the presence of illuvial clay coatings. Moreover, it includes carbonate coatings/infilling within pores. The presence of  
18    calcite within pores of spirititic grains indicates alternation of dissolution and re-precipitation of carbonate due to changes of the  
19    humidity regime (Zamanian et al., 2016).

20    The Bw horizon shows a weakly isotropic pedogenetic matrix, in cross-polarized light, with a change of colour from dark  
21    brown to yellowish brown. It includes poor illuvial clay coatings within the pores. These clay coatings are papules, i.e isolated  
22    fragments of clay coatings or weathered mica mineral. The pedogenetic matrix has in some areas a more developed pedogenetic  
23    aggregation.

24    Selective extraction and related geochemical indexes are listed in Tab. S2. The Alo+ 0.5 Feo ICOMAND index  
25    (ICOMAND,1988), which ranges between 0.89 and 1.13 %, is lower than the minimum required to define an andosol (2%), in  
26    according with the WRB criteria for the andic properties (IUSS Working Group WRB, 2014). Nonetheless, this index is  $\geq$   
27    0.4%, which is a low-level proxy for andic properties according to the USDA Soil Taxonomy, along with a volcanic glass  
28    content  $\geq$  5% (Soil Survey Staff, 2014). In the whole, low (Alo–Alp)/Sio ratio, together with Alp/Alo values close to 0.7 and  
29    low value of Sio ( $< 0.6$ ) indicates Alu-andic properties of the paleosol (IUSS, Working Group,WRB 2014). This means that Al  
30    complexed by the organic matter prevails over the Al that entered in the crystal lattice of short-order range minerals (e.g.,  
31    García-Rodeja et al., 2007; Tangari et al., 2018). Therefore, this paleosol shows a weak andic properties. These ratios are  
32    consistent with the pedogenetic indices Feo/Fed (0.17-0.18), suggesting a low amount of non-crystalline iron (Parfitt and Child,  
33    1988), comparable with other soils located in the Matese Mt.s (Campitello Matese and Cole Santa Croce sites; Colombo et al.,  
34    2014). Fed values are greater than Feo, suggesting that high amount of iron are released from weathering of Fe-bearing minerals  
35    and transformed in crystalline Fe-oxides. Nevertheless, the low values of pedogenic iron indices Fed/Fet (between 0.25 and  
36    0.17) and (Fed-Feo)/Fet (between 0.21 and 0.14) indicate mainly a low degree of pedogenetic development. In fact, these ratios  
37    increase with increasing degree of pedogenic maturity, because free Fe (released from weathering of primary minerals) and  
38    crystalline Fe (fixed mainly in Fe-oxides) increase with pedogenesis (e.g. Torrent et al., 1980; Scarciglia et al., 2018).

Furthermore, high values of Fed-Fet indices (between 6.69 and 8.21) indicate that iron is still present in the crystal lattices of Fe-bearing primary minerals (e.g. Scarciglia et al., 2018). In summary, the soil shows a poor pedogenetic evolution as confirmed by the medium-to-coarse grain-size, the presence of abundant skeletal fraction, the pedogenetic indices, and the poor clay illuviation. These features confirm a young soil age, in line with the clay illuviation found more frequently in Holocene soils (e.g., Xiubin et al., 2008; Bronger et al., 2019). Some uneven patterns of the above ratios and the micromorphology of the soil, with strong colour changes in the pedogenetic matrix within soil horizons, can indicate some disturbance of the pedogenic processes. This disturbance can be related to erosion and colluviation. All these features indicate the coexistence of young and old pedogenetic features of late Pleistocene to Holocene age, in substantial agreement with radiocarbon dating (Tab. 1).

## References

- Bronger, A. and Šmolíková, L.: Quaternary loess-paleosol sequences in East and Central Asia in comparison with Central Europe – micromorphological and paleoclimatological conclusions, *Boletín de la Sociedad Geológica Mexicana*, 71, 65–92, 2019.
- Colombo, C., Sellitto, V.M., Palumbo, G., Di Iorio, E., Terribile, F., and Schulze, D.G.: Clay formation and pedogenetic processes in tephra-derived soils and buried soils from Central-Southern Apennines (Italy), *Geoderma*, 213, 346–356, 2014.
- García-Rodeja, E., Nóvoa, J.C., Pontevedra, X., Martínez-Cortizas, A., and Buurman, P.: Aluminium and iron fractionation of European volcanic soils by selective dissolution techniques, in: *Soils of Volcanic Regions in Europe*, edited by Arnalds, O., Bartoli, F., Buurman, P., Óskarsson, H., Stoops, G., and García-Rodeja, E., Springer, Berlin, Germany 325–351, 2007.
- ICOMAND: Circular Letter No. 10. International Committee on the Classification of Andisols, New Zealand Soil Bureau, Lower Hutt, New Zealand, 1988.
- IUSS Working Group WRB: World Reference Base for Soil Resources 2014, International Soil Classification System for Naming Soils and Creating Legends for Soil Maps, FAO, Rome, World Soil Resources Reports 106, 181 pp., 2014.
- Parfitt, R.L., Childs, C.W.: Estimation of forms of Fe and Al: a review, and analysis of contrasting soils by dissolution and Mössbauer methods, *Aust. J. Soil Res.*, 26, 121–144, 1988.
- Scarciglia, F., Mercatante, G., Fondevilla, V., Anadón, R., Oms, O., Donato, P., Agnini, C., Papini, M., Rook, L., and Ghinassi, M.: Pleistocene paleosol development and paleoenvironmental dynamics in East Africa: A multiproxy record from the Homo-bearing Aalat pedostratigraphic succession, Dandiero basin (Eritrea), *Quaternary science reviews*, 191, 275–298, 2018.
- Soil Survey Staff: Keys to Soil Taxonomy, 12th ed. USDA-Natural Resources Conservation Service, Washington, DC, 351 pp., 2014.
- Tangari, A.C., Scarciglia, F., Piluso, E., Marinangeli, L., and Pompilio, L.: Role of weathering of pillow basalt, pyroclastic input and geomorphic processes on the genesis of the Monte Cerviero upland soils (Calabria, Italy), *Catena*, 171, 299–315, 2018.
- Torrent, J., Schwertmann, U., and Schulze, D.J.: Iron oxide mineralogy of some soils of two river terrace sequences in Spain, *Geoderma*, 23, 191–208, 1980.
- Xiubin, H., Yuhai, B., Lizhong, H., and Keli, T.: Clay Illuviation in a Holocene Palaeosol -Sequence in the Chinese Loess Plateau, in: *New Trends in Soil Micromorphology* edited by: Kapur, S., Mermut, A., and Stoops, G., Springer, Berlin, Heidelberg, Germany, 2008.

- 76 Zamanian, K., Pustovoytov, K., and Kuzyakov, Y.: Pedogenic carbonates: forms and formation Processes, Earth-Science  
77 Reviews, 157, 1–17, 2016.
