# Supplementary figures and images for: Late Quaternary faulting in the southern Matese (Italy): implications for earthquake potential and slip rate variability in the southern Apennines
Source: Copernicus journal article supplement (doi:10.5194/se-13-553-2022), 2022-03-17

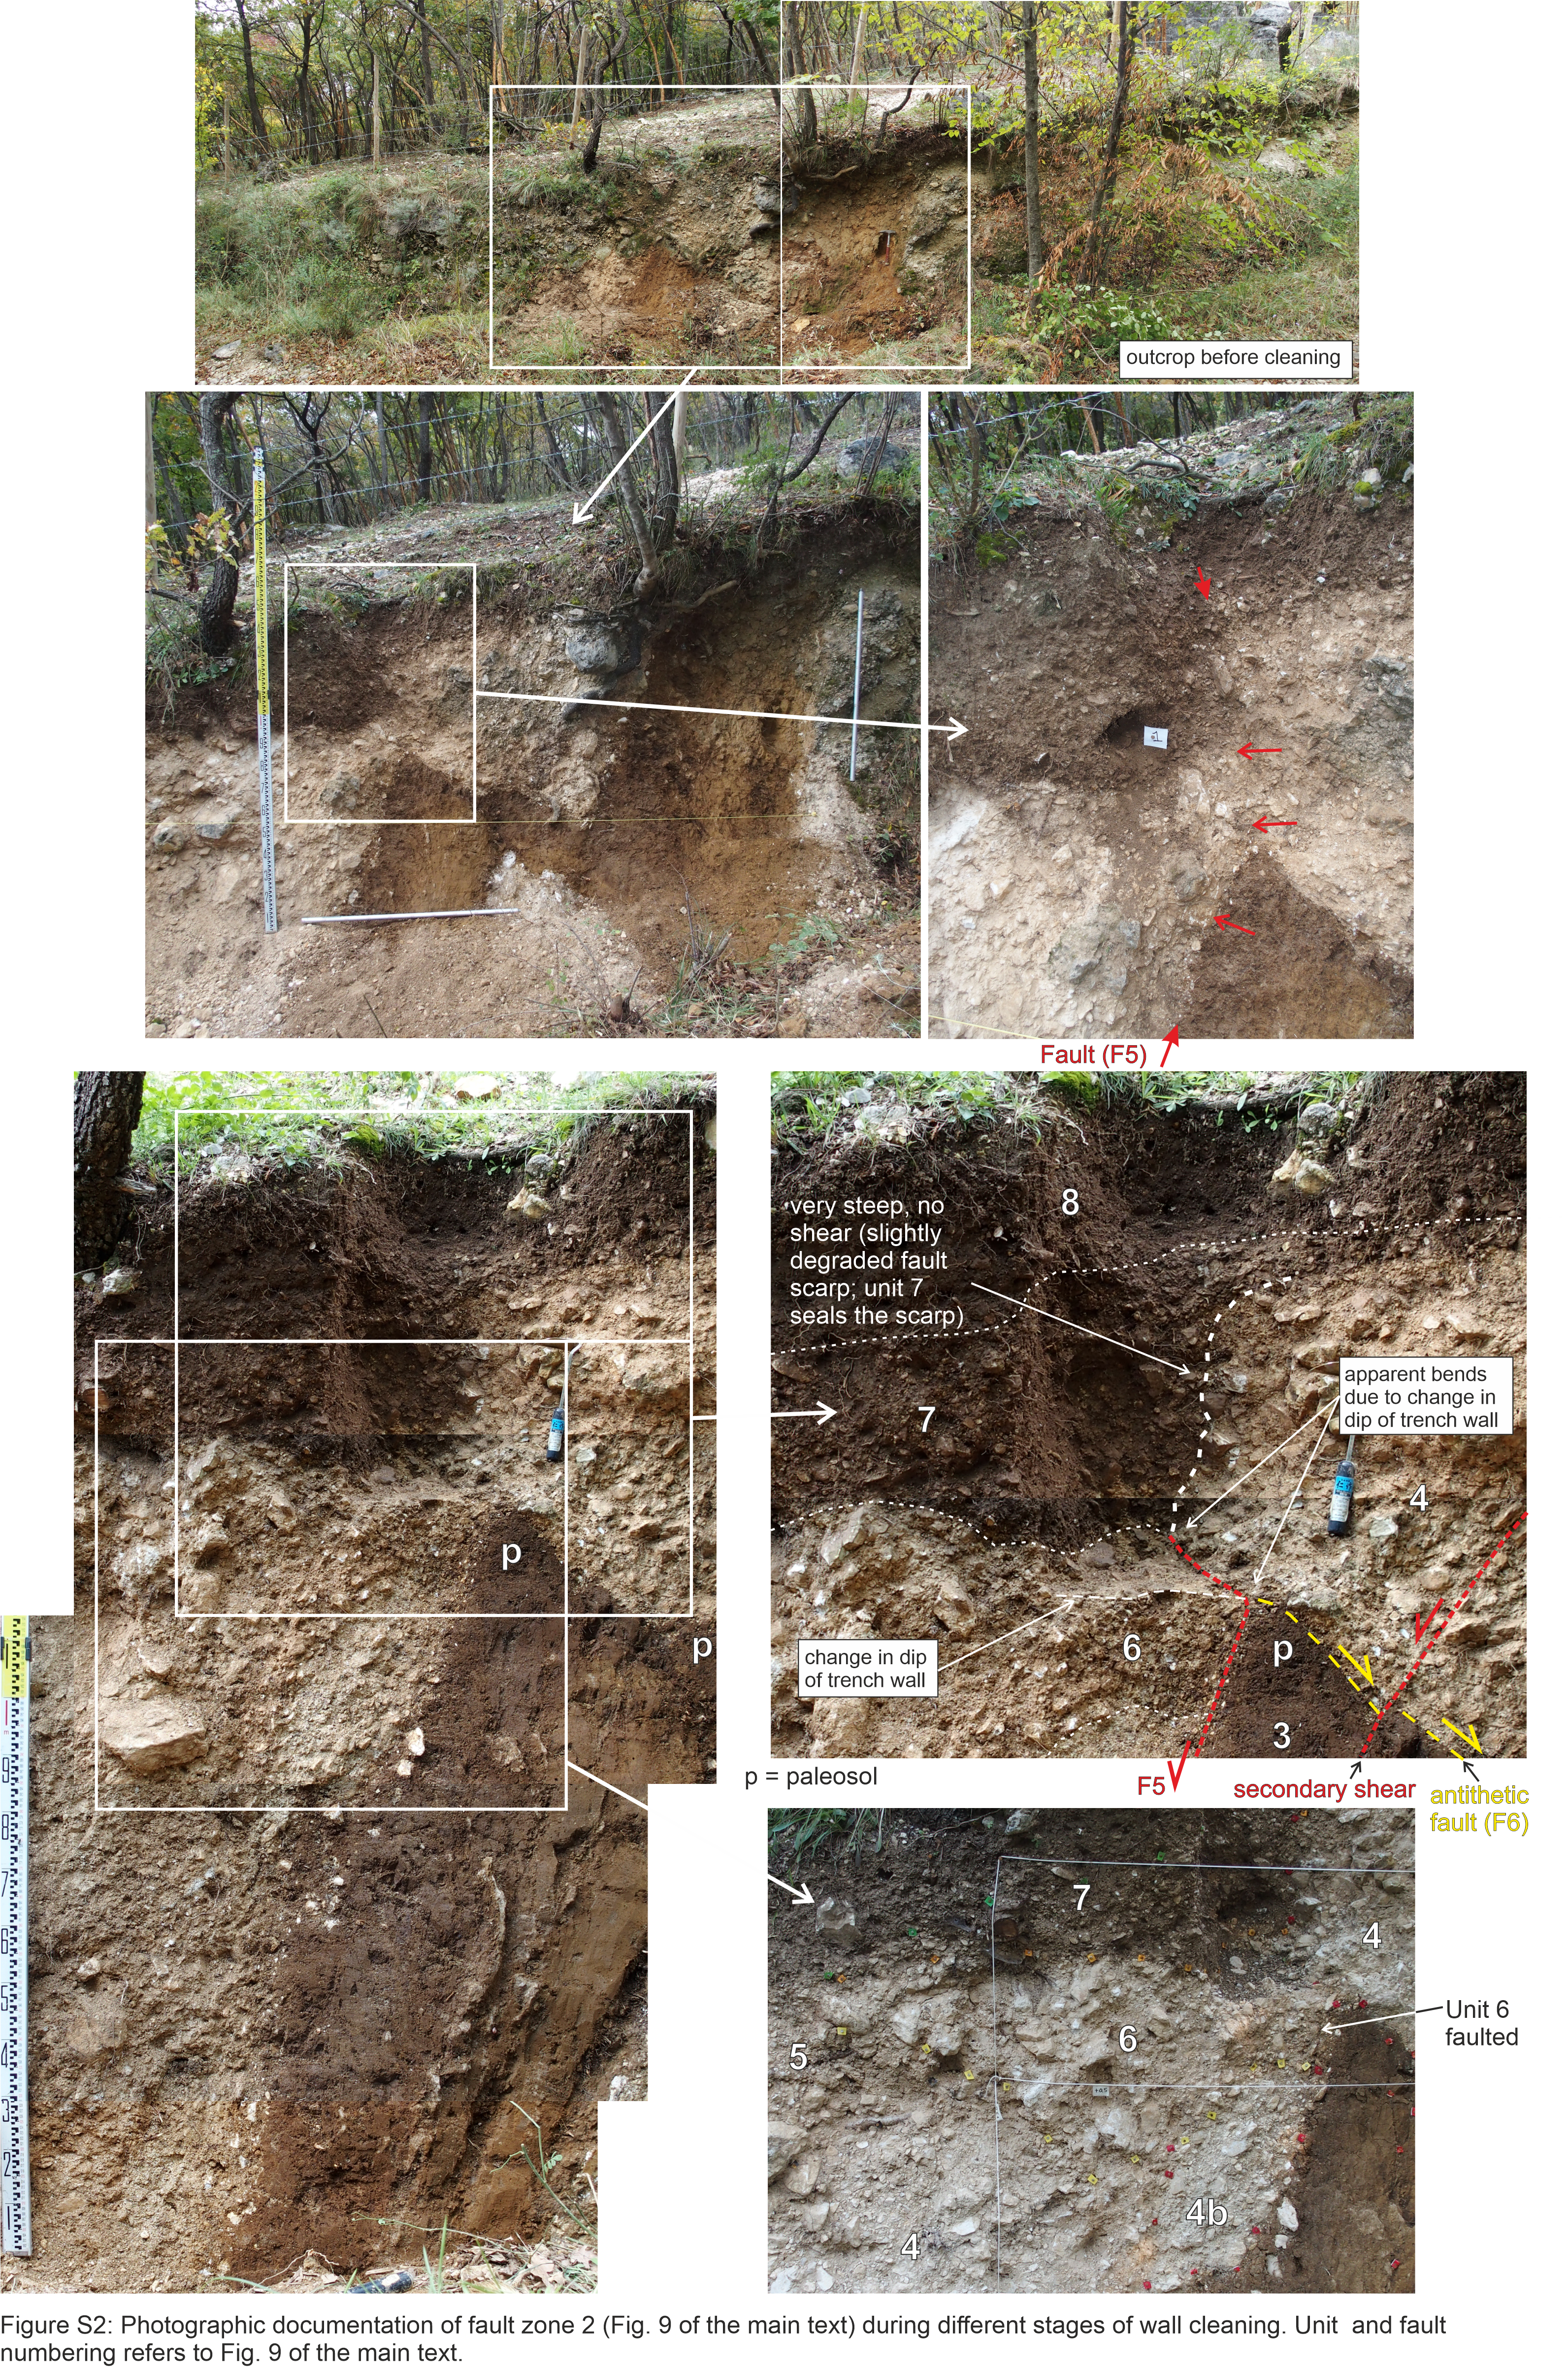

Supplement: Supplementary file 4 [file se-13-553-2022-supplement.zip › Figure-S2_details-faultzone2-Fig9.png]

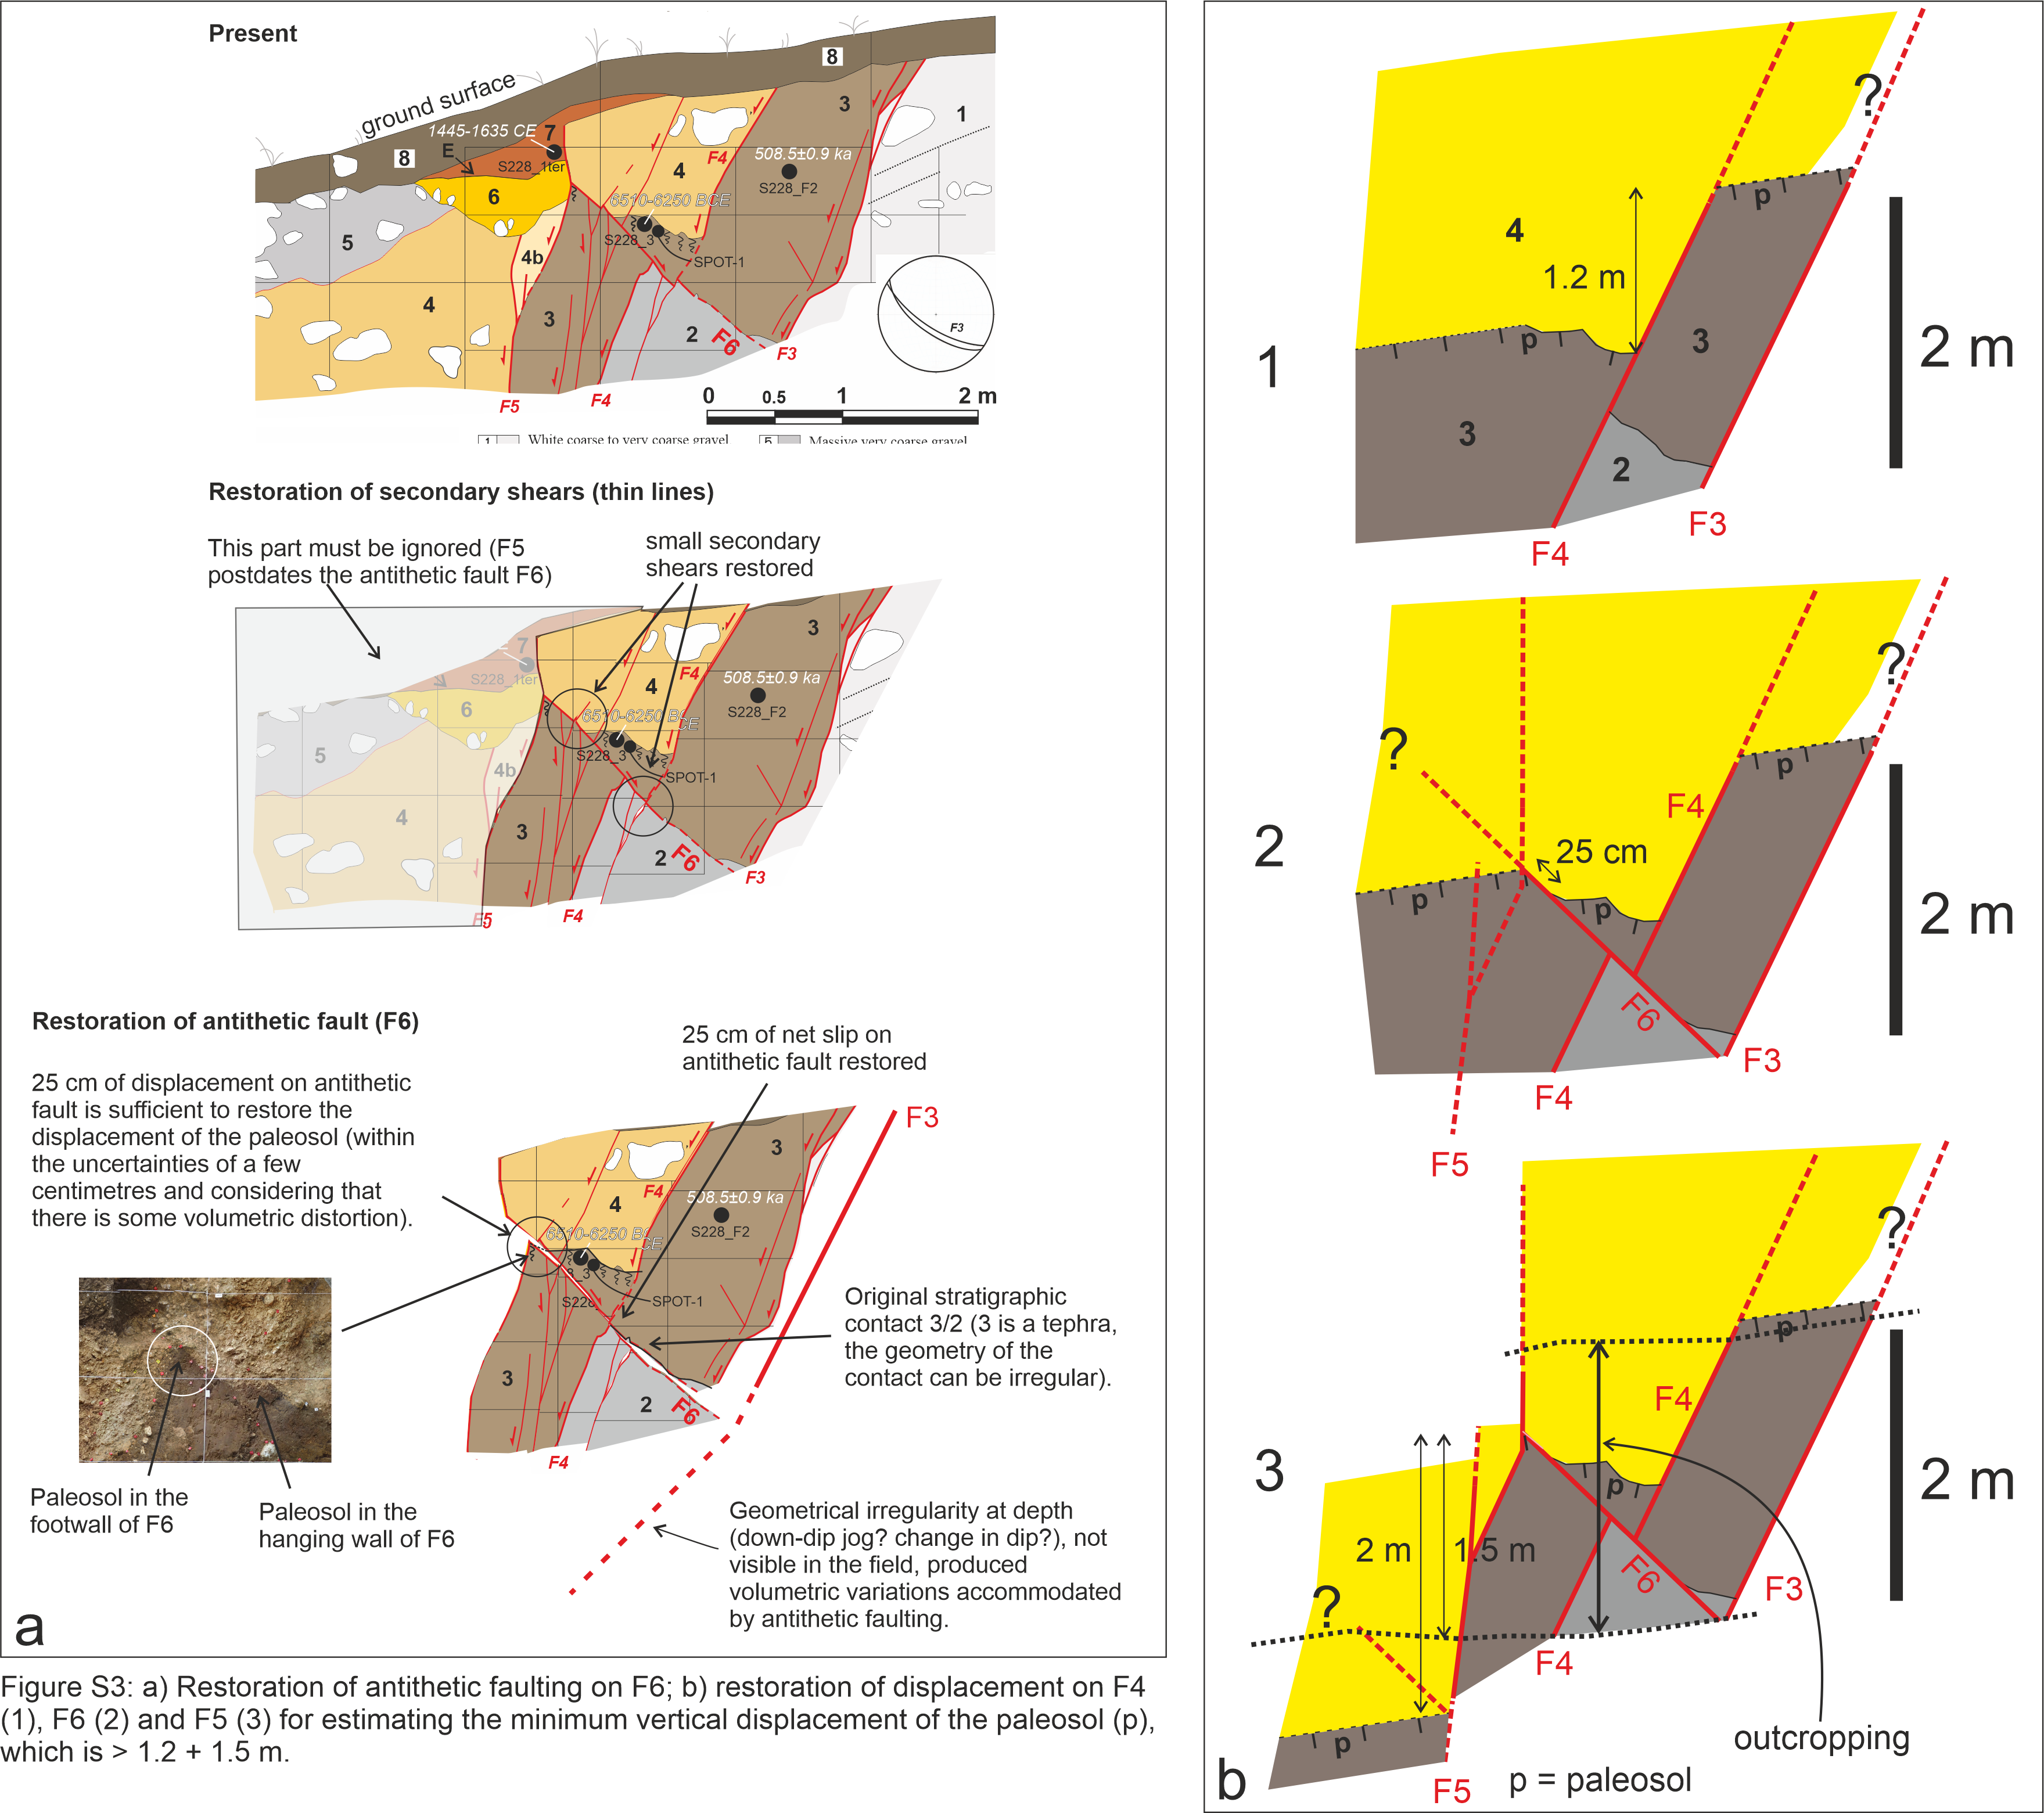

Supplement: Supplementary file 4 [file se-13-553-2022-supplement.zip › Figure-S3_restoration-F4-F5-antitheticF6.png]

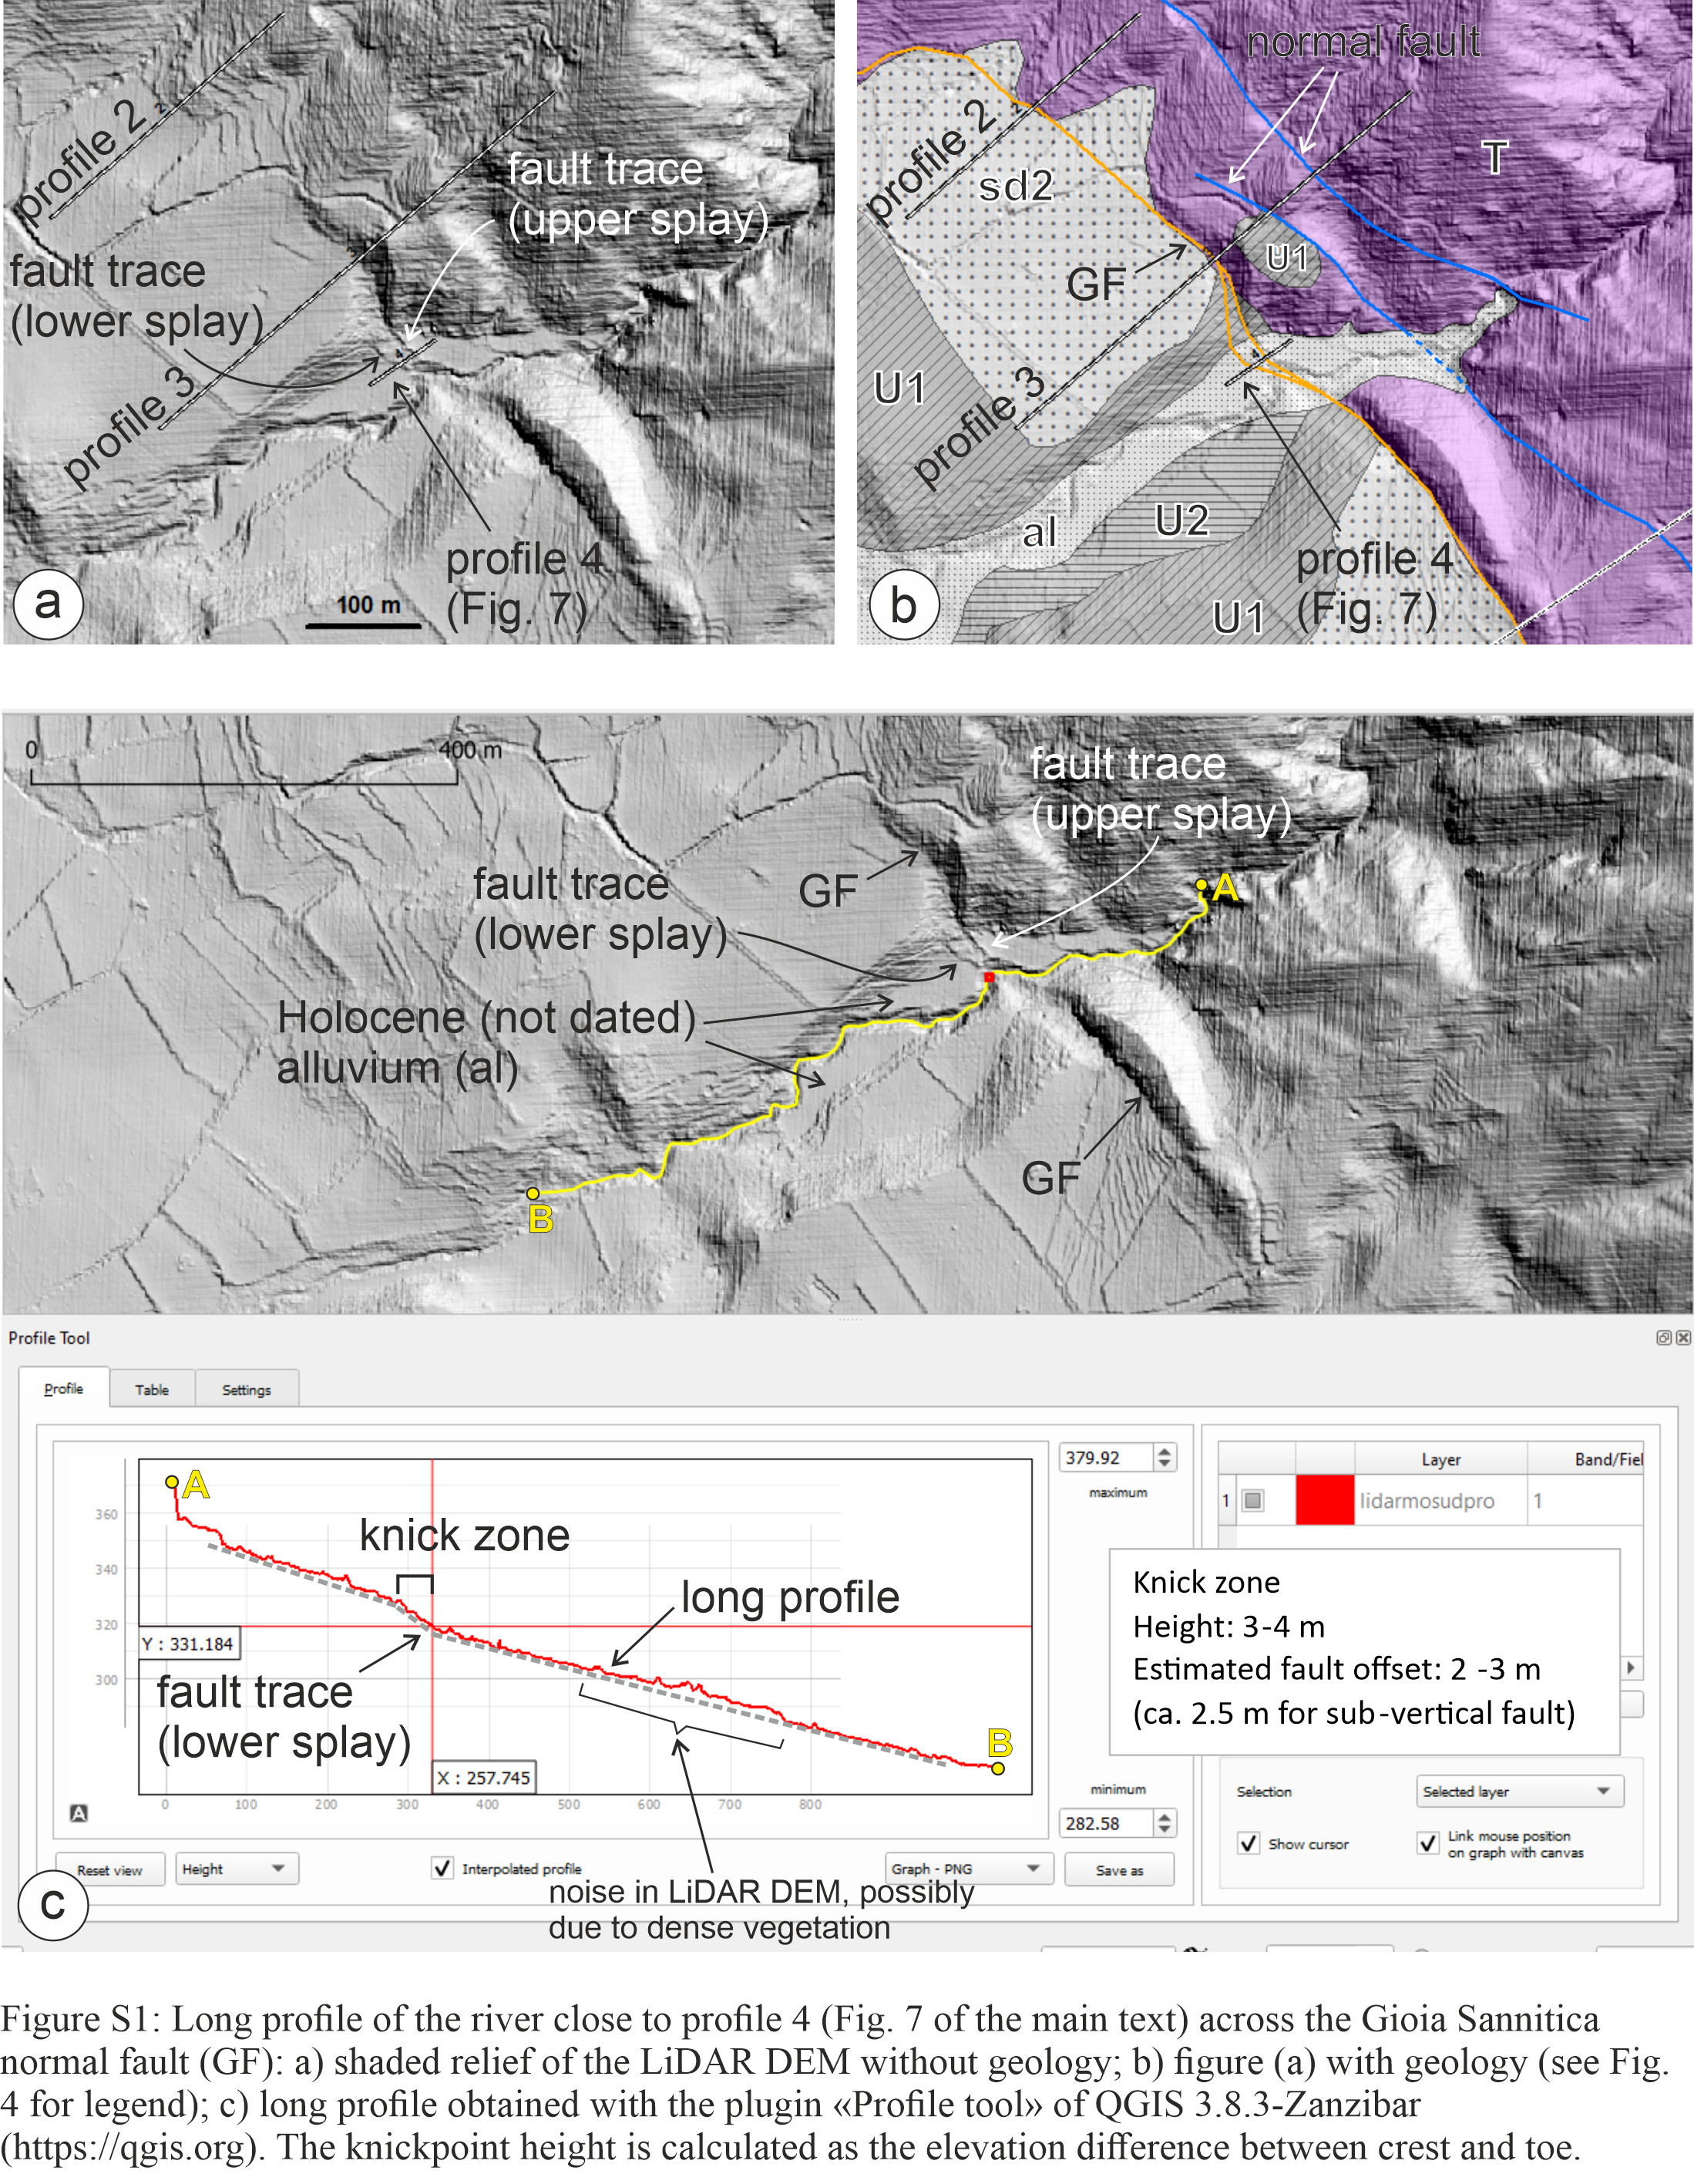

Supplement: Supplementary file 4 [file se-13-553-2022-supplement.zip › Figure-S1_knickpoint-close-to-profile4.png]

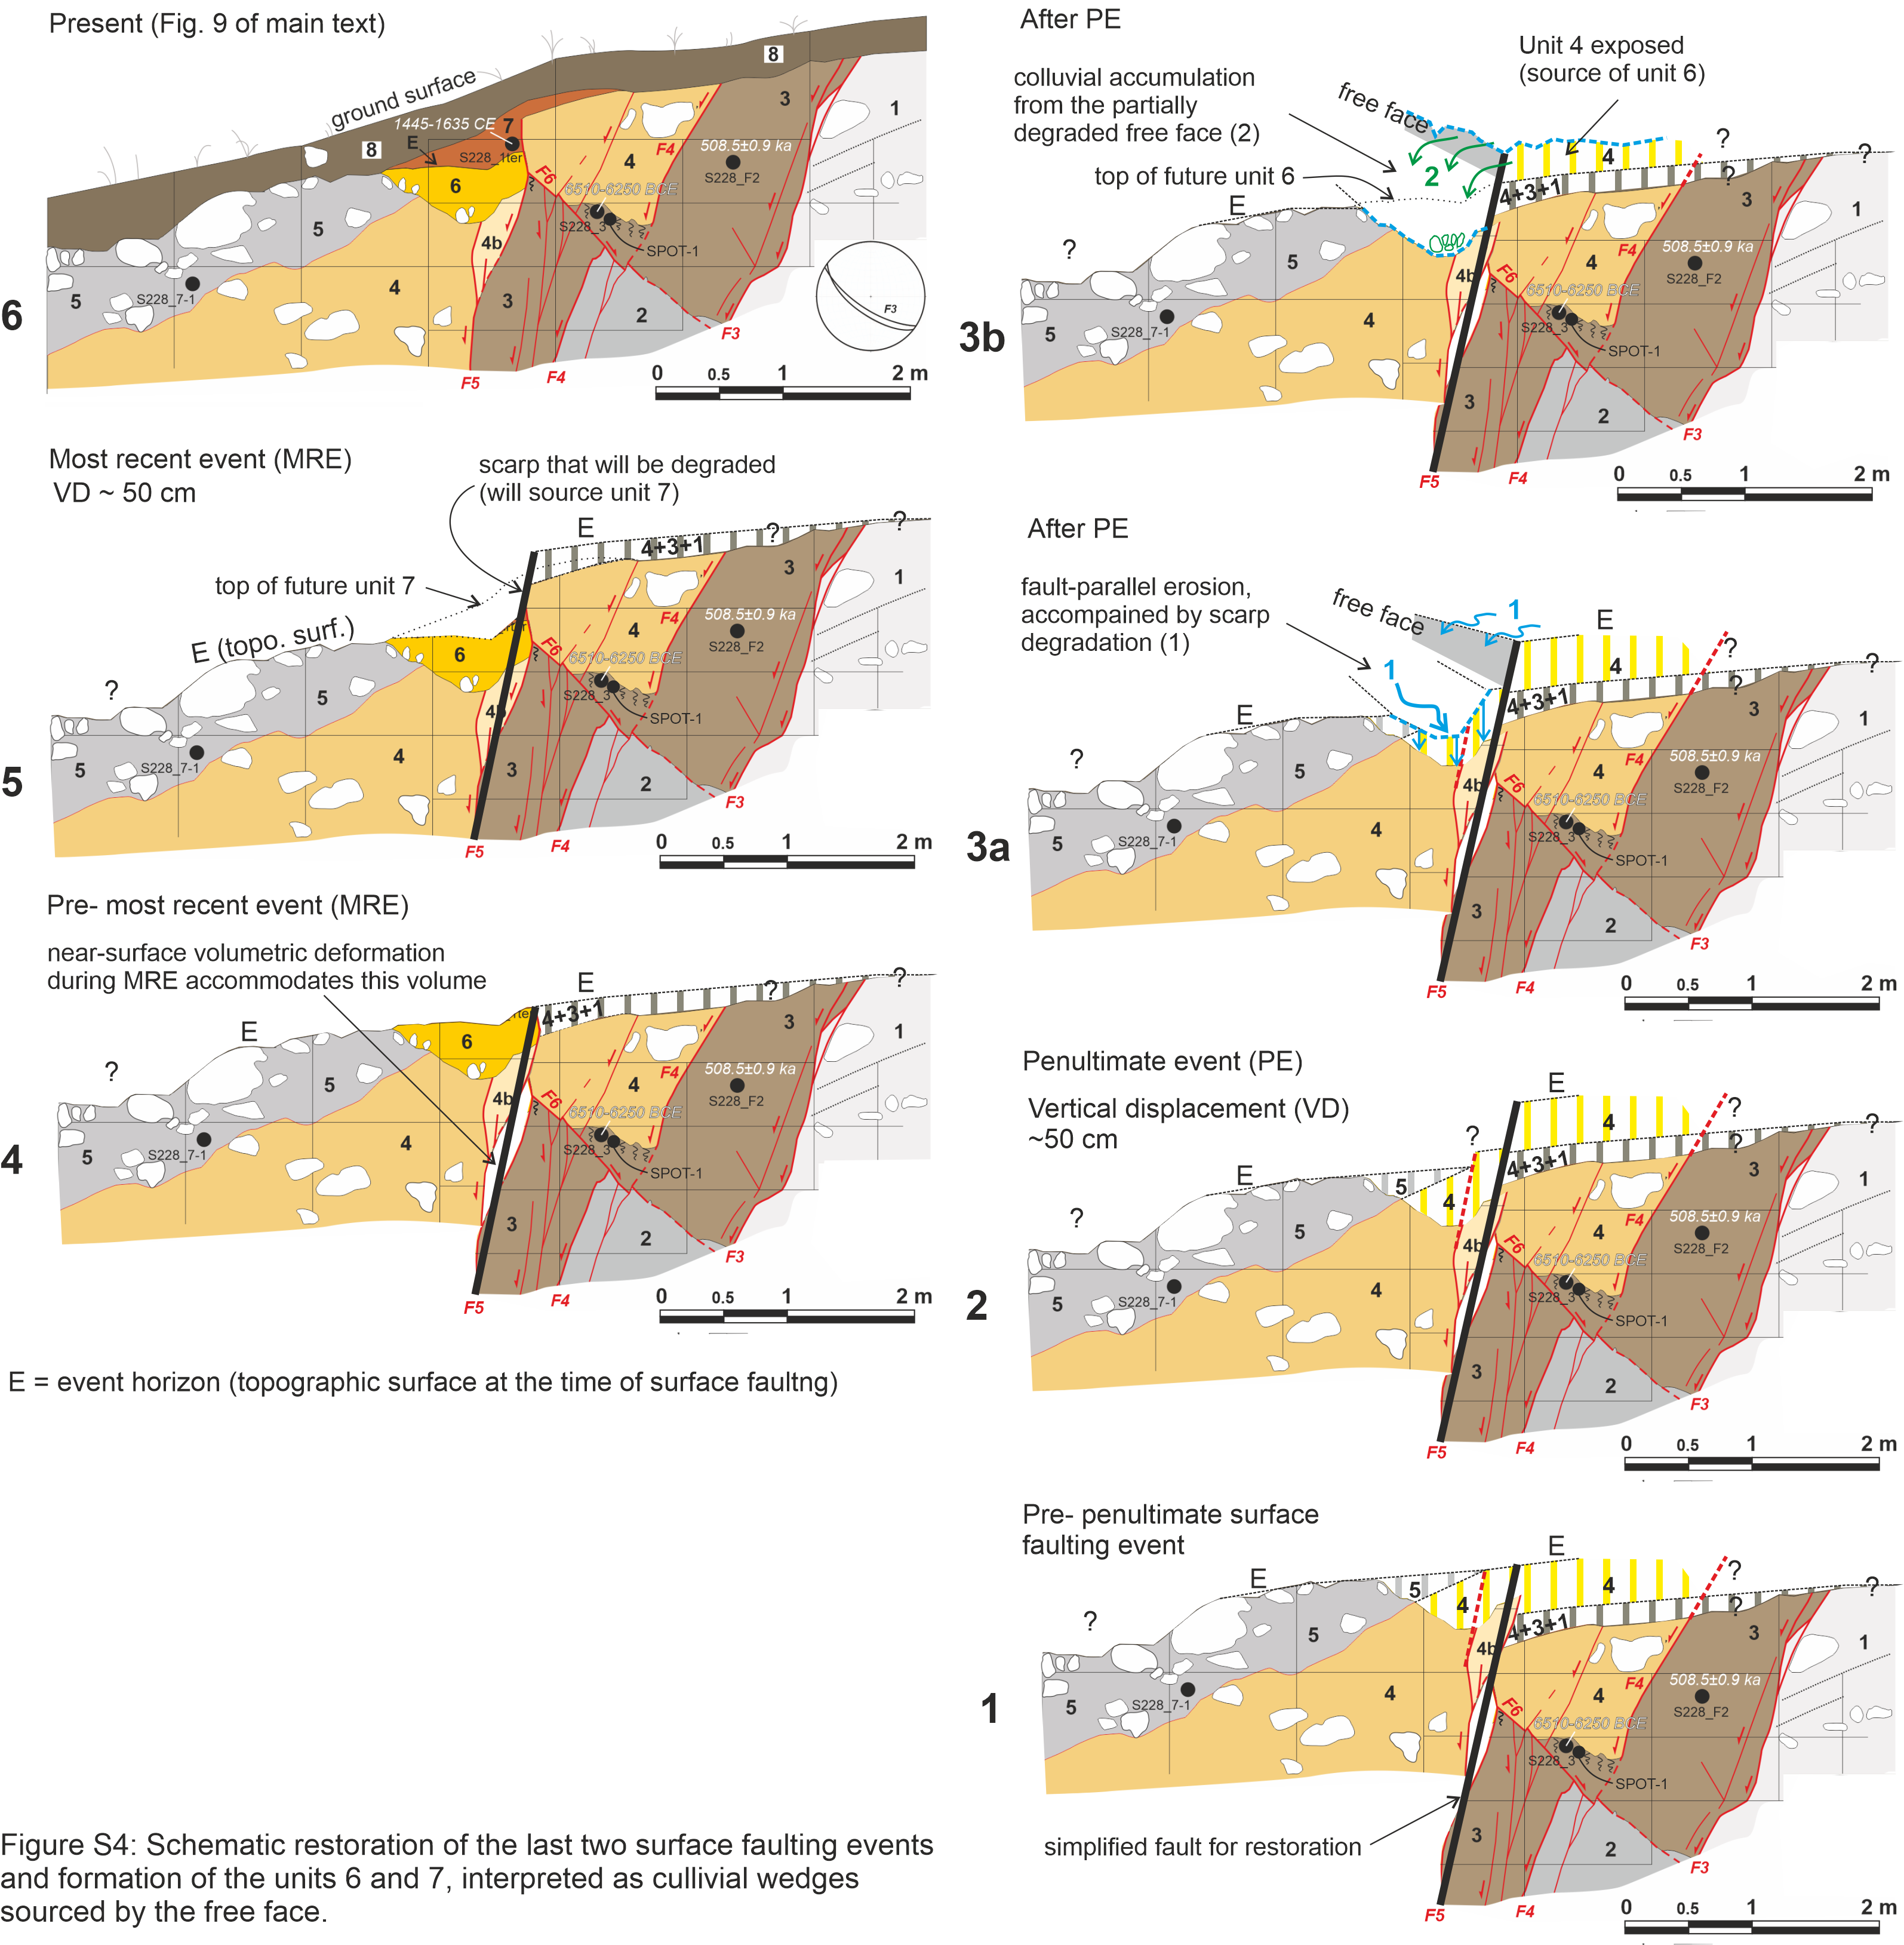

Supplement: Supplementary file 4 [file se-13-553-2022-supplement.zip › Figure-S4_restoration-surface-faulting-events.png]
